# Supplementary material for: Paediatric Asthma and the Microbiome: A Systematic Review
Source: MDPI journal article supplement (doi:10.3390/microorganisms11040939), 2023-04-03
Supplement: s1 [file s1]

**Table S2 quality assessment tools**

**Risk of bias assessment tool 1** Newcastle–Ottawa Scale (NOS) for human case-control studies.

| Citation | Selection <sup>1</sup>                    |                                 |                       |                        | Comparability <sup>2</sup>                                                 | Exposure <sup>3</sup>     |                                                     |                   | Total <sup>4</sup> | Rate <sup>5</sup> |
|----------|-------------------------------------------|---------------------------------|-----------------------|------------------------|----------------------------------------------------------------------------|---------------------------|-----------------------------------------------------|-------------------|--------------------|-------------------|
|          | Is the case (asthma) definition adequate? | Representativeness of the cases | Selection of controls | Definition of controls | Comparability of cases and controls on the basis of the design or analysis | Ascertainment of exposure | Same method of ascertainment for cases and controls | Non-response rate |                    |                   |
|          |                                           |                                 |                       |                        |                                                                            |                           |                                                     |                   |                    |                   |
|          |                                           |                                 |                       |                        |                                                                            |                           |                                                     |                   |                    |                   |
|          |                                           |                                 |                       |                        |                                                                            |                           |                                                     |                   |                    |                   |

<sup>1</sup>A study can be awarded a maximum of one star for each numbered item within the selection, the star was translated into 1, if no star, then 0.

<sup>2</sup>A maximum of two stars can be given for comparability, the star was translated into 2 or 1, if no stars then 0.

<sup>3</sup>A study can be awarded a maximum of one star for each numbered item within the exposure, the star was translated into 1, if no star, then 0.

<sup>4</sup>The maximum number was nine stars, which were translated into nine.

<sup>5</sup>Quality rate was identified as good, fair or poor based on Agency for Health Research and Quality standards.

**Risk of bias assessment tool 2** Newcastle–Ottawa Scale (NOS) for human cohort studies.

| Citation | Selection <sup>1</sup>                   |                                     |                                       |                                                                                   | Comparability <sup>2</sup>                                      | Outcome <sup>3</sup>  |                                                |                                  | Total <sup>4</sup> | Rate <sup>5</sup> |
|----------|------------------------------------------|-------------------------------------|---------------------------------------|-----------------------------------------------------------------------------------|-----------------------------------------------------------------|-----------------------|------------------------------------------------|----------------------------------|--------------------|-------------------|
|          | Representativeness of the exposed cohort | Selection of the non-exposed cohort | Ascertainment of exposure to implants | Demonstration that outcome of interest (asthma) was not present at start of study | Comparability of cohorts on the basis of the design or analysis | Assessment of outcome | Was follow up long enough for outcome to occur | Adequacy of follow-up of cohorts |                    |                   |
|          |                                          |                                     |                                       |                                                                                   |                                                                 |                       |                                                |                                  |                    |                   |
|          |                                          |                                     |                                       |                                                                                   |                                                                 |                       |                                                |                                  |                    |                   |

<sup>1</sup>A study can be awarded a maximum of one star for each numbered item within the selection, the star was translated into 1, if no star, then 0.

<sup>2</sup>A maximum of two stars can be given for comparability, the star was translated into 2 or 1, if no stars then 0.

<sup>3</sup>A study can be awarded a maximum of one star for each numbered item within the outcome, the star was translated into 1, if no star, then 0.

<sup>4</sup>The maximum number was nine stars, which were translated into nine.

<sup>5</sup>Quality rate was identified as good, fair, or poor based on Agency for Health Research and Quality standards.

**Risk of bias assessment tool 3** Newcastle–Ottawa Scale (NOS) for human cross-sectional studies.

| Citation | Selection <sup>1</sup>           |             |                 |                               | Comparability <sup>2</sup>                                                                                                          | Outcome <sup>3</sup>  |                  | Total | Rate <sup>5</sup> |
|----------|----------------------------------|-------------|-----------------|-------------------------------|-------------------------------------------------------------------------------------------------------------------------------------|-----------------------|------------------|-------|-------------------|
|          | Representativeness of the sample | Sample size | Non-respondents | Ascertainment of the exposure | The subjects in different outcome groups are comparable, based on the study design or analysis. Confounding factors are controlled. | Assessment of outcome | Statistical test |       |                   |
|          |                                  |             |                 |                               |                                                                                                                                     |                       |                  |       |                   |
|          |                                  |             |                 |                               |                                                                                                                                     |                       |                  |       |                   |

<sup>1</sup>Apart from ‘ascertainment of the exposure’ item, a study can be awarded a maximum of one star for each numbered item within the selection, the star was translated into 1, if no star, then 0. The ascertainment of the exposure item can be awarded two stars if validated measurement tool was used in the study.

<sup>2</sup>A maximum of two stars can be given for comparability, the star was translated into 2 or 1, if no stars then 0.

<sup>3</sup>A study can be awarded a maximum of two stars for assessment of outcome if independent blind assessment was used in the study. While statistical test can be awarded a maximum of one star. The star was translated into 1 or 2 if no star, then 0.

<sup>4</sup>The maximum number was ten stars, which were translated into 10.

<sup>5</sup>Quality rate was identified as good, fair or poor based on Agency for Health Research and Quality standards.

**Risk of bias assessment tool 4** The systematic review centre for laboratory animal experimentation risk of bias assessment tool for mouse model studies.

| Citation | Selection bias      |                          |                        | Performance bias |          | Detection bias            |          | Attrition bias          | Reporting bias              | Other                                                                                   |
|----------|---------------------|--------------------------|------------------------|------------------|----------|---------------------------|----------|-------------------------|-----------------------------|-----------------------------------------------------------------------------------------|
|          | Sequence generation | Baseline characteristics | Allocation concealment | Random housing   | Blinding | Random outcome assessment | Blinding | Incomplete outcome data | Selective outcome reporting | Was the study apparently free of other problems that could result in high risk of bias? |
|          |                     |                          |                        |                  |          |                           |          |                         |                             |                                                                                         |
|          |                     |                          |                        |                  |          |                           |          |                         |                             |                                                                                         |
